# Supplementary material for: Novel high-thermal-conductivity composite ceramic phosphors for high-brightness laser-driven lighting
Source: Royal Society of Chemistry journal article supplement (doi:10.1039/d1tc02202d), 2021-01-01
Supplement: d1tc02202d1.pdf [file d1tc02202d1.pdf]

## **Electronic Supplementary Information**

# **Novel high-thermal-conductivity composite ceramic phosphors for high-brightness laser-driven lighting**

Huanyu Zhao<sup>a,b</sup>, Huaqian Yu<sup>a</sup>, Jian Xu<sup>c</sup>, Mu Zhang<sup>a,b\*</sup>, Xiaodong Li<sup>a</sup>, Xudong Sun<sup>d,b\*</sup>

<sup>a</sup>*Key Laboratory for Anisotropy and Texture of Materials (Ministry of Education), School of Materials Science and Engineering, Northeastern University, Shenyang, 110819, China*

<sup>b</sup>*Foshan Graduate School of Northeastern University, Foshan, 528311, China*

<sup>c</sup>*School of Physics and Electronic Information, Henan Polytechnic University, Jiaozuo, 454000, China*

<sup>d</sup>*State Key Laboratory of Rolling and Automation, Northeastern University, Shenyang 110819, China*

## 1. Supporting Figures

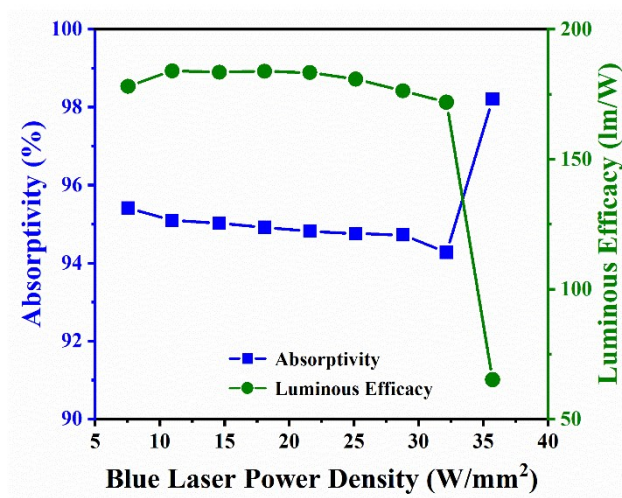

Fig. S1 Blue light absorptivity and luminous efficacy of the MgO–40 vol% YAG:Ce composite ceramic under blue-laser excitation with various power densities.
